# 1 miRNA-dependent poly(A) length control in uncoupling 2 transcription and translation of haploid male germ cells

3  
4 Chong Tang<sup>a,b,1,2</sup>, Mei Guo<sup>b,1</sup>, Zhuoxing Shi<sup>b,1</sup>, Zhuqing Wang<sup>c,1</sup>, Chunhai Luo<sup>a,1</sup>, Sheng  
5 Chen<sup>f</sup>, Fengying Ruan<sup>b</sup>, Zhichao Chen<sup>b</sup>, Linfeng Yang<sup>b</sup>, Xiongyi Wei<sup>b</sup>, Chuanwen Wu<sup>b</sup>, Bei  
6 Luo<sup>b</sup>, Zhou Lv<sup>b</sup>, Jin Huang<sup>b</sup>, Dong Zhang<sup>b</sup>, Cong Yu<sup>b</sup>, Qiang Gao<sup>b</sup>, Ying Zhang<sup>a,2</sup>, Wei  
7 Yan<sup>c,d,e,2</sup>, Fei Sun<sup>a,2</sup>

8  
9 <sup>a</sup>Institute of Reproductive Medicine, Nantong University School of Medicine, Nantong  
10 University, Nantong 226001, Jiangsu, China; <sup>b</sup>BGI Genomics, BGI-Shenzhen, Shenzhen  
11 518083, China; <sup>c</sup>Department of Physiology and Cell Biology, University of Nevada, Reno  
12 School of Medicine, 1664 North Virginia Street, MS575, Reno, NV 89557, USA; <sup>d</sup>The  
13 Lundquist Institute for Biomedical Innovation at Harbor-UCLA Medical Center, Torrance, CA  
14 90502, USA; <sup>e</sup>Department of Medicine, David Geffen School of Medicine at UCLA, Los  
15 Angeles, CA 90095, USA; <sup>f</sup>China Medical University, Department of Laboratory Animal  
16 Science

17  
18

19 <sup>1</sup>These authors contributed equally to this work: Chong Tang, Mei Guo, Zhuoxing Shi,  
20 Zhuqing Wang, and Chunhai Luo

21  
22  
23

24 *Running title: mRNA fate control by poly(A) length*

25  
26

<sup>2</sup>Correspondence:

Chong Tang, email: [tangchong@bgi.com](mailto:tangchong@bgi.com); Fei Sun, email: [sunfei@ntu.edu.cn](mailto:sunfei@ntu.edu.cn); Wei Yan,  
email: [wei.yan@lundquist.org](mailto:wei.yan@lundquist.org); Ying Zhang, email: [clairezhang1211@ntu.edu.cn](mailto:clairezhang1211@ntu.edu.cn)

Contact author:

Wei Yan, email: [wei.yan@lundquist.org](mailto:wei.yan@lundquist.org)

## 1 **Abstract**

2 As one of the post-transcriptional regulatory mechanisms, transcription and translation's  
3 uncoupling plays an essential role in development and adulthood physiology. However, it  
4 remains elusive how thousands of mRNAs get translationally silenced while stability is  
5 maintained for up to hours or even days before translation. In addition to oocytes and neurons,  
6 developing spermatids have significant uncoupling of transcription and translation for delayed  
7 translation. Therefore, spermiogenesis represents an excellent *in vivo* model for investigating  
8 the mechanism underlying uncoupled transcription and translation. Through full-length poly(A)  
9 deep sequencing, we discovered dynamic changes in poly(A) length through deadenylation  
10 and re-polyadenylation. Deadenylation appeared to be mediated by microRNAs (miRNAs),  
11 and transcripts with shorter poly(A) tails tend to be sequestered into ribonucleoproteins (RNPs)  
12 for translational repression and stabilization. In contrast, re-polyadenylation allows for  
13 translocation of the translationally repressed transcripts from RNPs to polysomes for  
14 translation. Overall, our data suggest that miRNA-dependent poly(A) length control represents  
15 a novel mechanism underlying uncoupled translation and transcription in haploid male germ  
16 cells.

17

18 **Keywords:** poly(A) tail; microRNA; deadenylation; adenylation; phase separation; RNP;  
19 polysome; spermiogenesis; alternative splicing; uncoupling of transcription and translation;  
20 infertility

21

22

23

24

## 1 **Introduction**

2 Once synthesized, transcripts undergo extensive post-transcriptional modifications at both  
3 nucleus and cytoplasm [1]. In the nucleus, the premature mRNAs are processed into mature  
4 mRNAs by removing introns through splicing and adding 5' caps and 3' polyadenylated (poly(A))  
5 tails. The poly(A) tail is critical for nuclear export, stability, and translation of mRNAs [2, 3]. In  
6 eukaryotic somatic cells, most cytoplasmic mRNAs' poly(A) tails are shortened over time  
7 through deadenylation [4]. The shortening of poly(A) tail leads to reduced translational  
8 efficiency and increased degradation. Interestingly, the poly(A) tails of mRNAs can also be  
9 lengthened through cytoplasmic polyadenylation in specific cell types, including oocytes, early  
10 embryos, and neurons [5-7]. In mature oocytes, although mRNAs have shorter poly(A) tails  
11 (<20nt), they are stable and stored in ribonucleoprotein (RNP) particles without being  
12 translated [8, 9]. Soon after fertilization, these maternal transcripts are re-activated by  
13 cytoplasmic polyadenylation, which lengthens the poly(A) tails up to ~80-150nt followed by  
14 efficient translation to produce proteins that are essential for the survival and growth of the  
15 embryos, from the fertilized egg to the stage that the zygotic genome is activated (2-cell  
16 embryo stage and 4-cell embryo stage in mice and humans, respectively) [9, 10]. The  
17 physiological significance of such a long delay in translation lies in that post-fertilization  
18 development before zygotic genome activation requires many proteins, which must be  
19 synthesized using pre-transcribed and stored maternal transcripts. In neurons, transcribed  
20 mRNAs tend to accumulate in the cell body, and these transcripts are sequestered into RNP  
21 granules, which travel a long distance and then start translation when reach the axon terminals  
22 [11-13]. Similarly, the translationally repressed mRNAs in neurons tend to have shorter poly(A)  
23 tails. Once they reach the synaptic junctions, these transcripts undergo cytoplasmic  
24 polyadenylation to lengthen their poly(A) tails, followed by an efficient translation [14, 15].

1 These findings suggest that ploy(A) length control represents an integral mechanism  
2 underlying uncoupled transcription and translation.

3 In addition to oocytes and nerve cells, haploid male germ cells, i.e., spermatids, also  
4 display uncoupled transcription and translation [16, 17]. As soon as round spermatids start to  
5 elongate, transcription is shut down due to the onset of nuclear condensation. However, from  
6 the onset of spermatid elongation (step 9 in mice) to the completion of spermatid differentiation  
7 into spermatozoa (step 16 in mice), there are numerous steps through which structurally sound  
8 spermatozoa are assembled [16, 18]. Since transcription ceases upon elongation (step 9), all  
9 proteins needed for the rest of the steps of sperm assembly (steps 9-16 in mice) have to be  
10 produced using transcripts pre-synthesized before the transcriptional shutdown, i.e., in round  
11 spermatids (steps 1-8) and even in late pachytene spermatocytes. For example, *Spata6*  
12 mRNAs start to be expressed in late pachytene spermatocytes, and its mRNA expression  
13 persists through the entire haploid phase. However, its protein is not detected until the sperm  
14 connecting piece (neck) starts to assemble in step 9 spermatids [19]. Therefore,  
15 spermiogenesis, the process through which round spermatids differentiate into elongated  
16 spermatids and eventually spermatozoa, represents an excellent *in vivo* model for studying  
17 uncoupling transcription and translation [20, 21].

18 Uncoupling of transcription and translation in spermiogenesis is achieved through  
19 physical sequestration of mRNAs subjected to translational delay into the RNP granules, which  
20 exist as the Nuage (also called intramitochondrial cement) in spermatocytes and the  
21 chromatoid body in round spermatids [18, 22]. When spermiogenesis progresses to elongation  
22 steps, these mRNAs are gradually released from RNPs and loaded onto polysomes to  
23 translate into the proteins required for sperm assembly [16, 18, 20, 21]. Recent works have  
24 shed light on the underlying molecular mechanisms. Briefly, our earlier work has revealed that

1 RNP enrichment of mRNAs is a dynamic process, through which the overall length of 3' UTRs  
2 becomes increasingly shortened compared to that of polysome-enriched mRNAs when late  
3 pachytene spermatocytes develop into the round and elongated spermatids [23]. The global 3'  
4 UTR shortening is achieved through continuous shuffling of longer 3' UTR mRNAs out of RNPs  
5 followed by UPF1-3-mediated, selective degradation [24] and by targeting shorter 3' UTR  
6 mRNAs into RNPs [23]. In this way, the overall 3' UTR length of the entire mRNA transcriptome  
7 in elongating spermatids becomes shorter and shorter [23]. We have also reported data  
8 showing that both miRNAs and m6A modification on pre-mRNAs are involved in the global  
9 shortening of transcripts and delay translation [25, 26]. Precisely, proper m6A levels control  
10 correct splicing and, consequently, the expected length distribution of transcripts [25].  
11 Moreover, miRNAs target transcripts with longer 3' UTRs through binding the distal binding  
12 sites to polysomes for translation followed by degradation, whereas transcripts with shorter 3'  
13 UTRs only possess proximal miRNA binding sites, which, once bound by miRNAs, are targeted  
14 into RNPs for stability and translational repression [23].

15 Previous studies have shown that cytoplasmic poly(A) polymerases and poly(A) binding  
16 proteins are essential for spermiogenesis [27-30]. However, it remains unknown how poly(A)  
17 length is regulated during the global shortening of 3' UTRs and the dynamic translocation of  
18 mRNAs between RNPs and polysomes during spermiogenesis, due to technical difficulties in  
19 determining the full-length sequences of the poly(A) tails. Although both TAIL-seq and PAL-  
20 seq have been developed as the next generation sequencing (NGS)-based methods for  
21 determining poly(A) tail sequences [31, 32], the short reads of NGS (<300nt) do not allow for  
22 accurate determination of full-length poly(A) sequences, thus compromising analyses on the  
23 relationship among 3'UTR length, poly(A) tail length, exon splicing patterns and translational  
24 status. To overcome this problem, we developed a sensitive method based on the third-

1 generation PacBio sequencing, which we termed as poly(A)-PacBbio sequencing (PAPA-seq),  
2 similar to FLAM-seq[33]. PAPA-seq can accurately measure poly(A) length with reads covering  
3 the entire 3' ends and the full-length transcripts. Using this method, we discovered that poly(A)  
4 length regulation pattern, through deadenylation and cytoplasmic re-polyadenylation, in  
5 differentiating spermatids. Moreover, we found that the miRNA is an essential factor to  
6 regulate the poly(A) length and control the delay translation. For the first time, our data  
7 demonstrate the critical roles of poly(A) length and miRNA in uncoupling of transcription and  
8 translation, which is essential for normal spermiogenesis and male fertility.

9

## 10 **Results**

### 11 **Dynamic changes in poly(A) length correlate with extended stability and delayed** 12 **translation of mRNAs in developing haploid male germ cells**

13 Given that the poly(A) tail is well-known to affect mRNA stability and translational efficiency [2,  
14 3], we set out to measure the poly(A) length in spermatogenic cells using PAPA-seq (**Figure**  
15 **1A, 1B**), a sensitive method similar to FLAM-seq [34]. To construct libraries for PAPA-seq, the  
16 poly(U) polymerase was used to add a poly(GI) tail to the native poly(A) tail, and the reverse  
17 transcription was then performed to generate cDNAs containing the full-length poly(A) tails  
18 followed by sequencing using the PacBio system (**Figure 1B**). Spike-in RNAs were sequenced  
19 to cross-validate the PAPA-seq data (**Supplemental Figure S1**). Using a modified STA-PUT  
20 method [23], pachytene spermatocytes, round and elongating spermatids were purified from  
21 adult mouse testes with purities of 90%, 90%, and 75%, respectively (**Figure 1A,**  
22 **Supplemental Figure S2**).

23 Using PAPA-seq, we first examined the UTRs length during spermatogenesis.  
24 Consistent with our previous report by short reads sequencing [23], PAPA-seq data showed

1 that the 3' UTRs of mRNAs were progressively shortened when pachytene spermatocytes  
2 developed into the round and elongating spermatids (**Supplemental Figure S3A**). A similar  
3 trend was also observed in the 5' UTRs, but to a lesser extent (**Supplemental Figure S3B**).  
4 Supporting our previous finding that m6A-dependent splicing activities increase with the  
5 progression of spermiogenesis [25], further analyses of the PAPA-seq data also revealed  
6 increased splicing events (alternative exon, exon skipping etc.) when pachytene  
7 spermatocytes developed into the round and then elongating spermatids (**Supplemental**  
8 **Figure S4A**). The global shortening of 3' UTRs is believed to enhance translational efficiency  
9 because shorter 3' UTRs provide fewer binding sites for regulatory factors, including RNA-  
10 binding proteins (RNPs) and small non-coding RNAs (sncRNAs) [23, 24, 35].

11 Although poly(A) length has long been known to influence mRNA stability and  
12 translational efficiency [2, 3], it remains unknown how the poly(A) length is regulated and  
13 whether the poly(A) length control is involved in uncoupling of transcription and translation  
14 during spermiogenesis. Despite the progressively shortened 3' UTRs (**Supplemental Figure**  
15 **S3**) and decreased overall isoform transcript length (**Figure 1C**), we found that the poly(A) tail  
16 length was dynamically regulated in a biphasic fashion from pachytene spermatocytes to round  
17 and elongating spermatids (**Figure 1D**). The poly(A) tail length first increased from pachytene  
18 spermatocytes to round spermatids, which may contribute to the longer half-life of mRNAs that  
19 are pre-protected for delayed translation in late spermiogenesis (**Phase I, Figure 1D and**  
20 **Supplemental Figure S5**). In contrast, from round to elongating spermatids, the poly(A) length  
21 gradually decreased (**Phase II, Figure 1D**), suggesting that the shortening of the transcripts  
22 poly(A) tails coincides with the delayed translation progressing. Good agreement was found  
23 when comparing this result to the previous reports showing that shortening of the poly(A) tails  
24 correlates with translational activation in spermiogenesis [36, 37]. For example, transcript

1 isoforms of *Spata6* mRNAs start to be expressed in late pachytene spermatocytes, and more  
2 isoforms continue to be expressed through the entire haploid phase. However, its protein is  
3 only expressed in the developing connecting piece in elongating (steps 9-12) and elongated  
4 spermatids (steps 13-16) [19]. We observed that the poly(A) length of *Spata6* drastically  
5 increased from pachytene spermatocytes to elongating spermatids, and this increase in poly(A)  
6 length occurred before the peak expression of SPATA6 protein in elongated  
7 spermatids/spermatozoa (**Figure 1E**). Taken together, our PAPA-seq analyses revealed that  
8 mRNAs in round spermatids owned the longest poly(A) tails compared to pachytene  
9 spermatocytes and elongating/elongated spermatids despite the global shortening trend in  
10 overall length of the isoform transcripts. The increased poly(A) length may function to enhance  
11 stability to support delayed translation during late spermiogenesis

12

### 13 **miRNAs mediate deadenylation of mRNAs enriched in RNPs**

14 To further explore the effects of poly(A) length on mRNA translational repression and activation  
15 status, we fractionated cytosol of the three types of spermatogenic cells into RNP, mono- and  
16 poly-some fractions using sucrose gradient centrifugation followed by PAPA-seq. By  
17 measuring OD<sub>254</sub>, three fractions were observed: RNPs (Nuage/intramitochondrial cement in  
18 pachytene spermatocytes and chromatoid body in round spermatids), monoribosome, and  
19 polyribosome fractions (**Figure 2A**). The fractions' purity was validated through the well-known  
20 markers distributed in RNP/polysome fractions (**Supplemental Figure S6**). Transcripts in the  
21 polysome fractions actively undergo translation, whereas those in the RNP fractions are  
22 translationally suppressed [16, 20, 21, 38]. Interestingly, through PAPA-seq, we found that the  
23 average poly(A) length of RNP-enriched mRNAs was only 1/40 of those enriched in the  
24 polysome fractions (**Figure 2B**), suggesting that the deadenylation has a strong relationship



1 with the localization to RNPs. If this is the case, then a question arises: how are the mRNAs  
2 selected for deadenylation followed by sequestration in RNPs? Previous studies have shown  
3 that small non-coding RNAs (sncRNAs) are enriched in RNPs [23] and that Argonaute proteins  
4 (e.g., AGO2, MIWI, and MIWI2) are abundant in the chromatoid body [39], suggesting the  
5 relationship of between sncRNAs and deadenylating the target mRNAs. Following these clues,  
6 we hypothesized that the enhanced deadenylation of the transcripts that subjected to  
7 translational suppression in the RNP phase during spermiogenesis might involve sncRNAs.  
8 To substantiate this hypothesis, we analyzed the miRNA-mRNA target relationship in RNPs  
9 and polysomes. We found that RNP-enriched miRNAs' binding sites in the RNP-enriched  
10 transcripts with shorter poly(A) tails (~5nt) were much more concentrated at the 3' ends than  
11 those in polysome-enriched transcripts with longer poly(A) tails (~200nt) in pachytene  
12 spermatocytes (**Figure 2C**), suggesting that miRNAs may target 3' UTRs of the transcripts to  
13 initiate deadenylation, thus driving mRNA into RNPs. These results are in full agreement with  
14 previous studies about the miRNA driving mRNA into RNPs [23] and deadenylation [40-43].

15 Generally, in somatic cells, the miRNA-based deadenylation triggers the targeted  
16 mRNA decaying [43]. In contrast, the chromatoid body (RNP) in spermiogenic cells functions  
17 to store transcripts [44] and the fate of the deadenylated transcripts stored in RNP is not limited  
18 to decaying. To address the fate of the deadenylated transcripts, we compared the poly(A) tail  
19 length distributions between RNP and polysome fractions in the three types of spermiogenic  
20 cells. Surprisingly, increased polyadenylation could be detected in both RNP and polysome  
21 fractions in round spermatids (**Supplemental Figure S7**). The presence of the newly  
22 polyadenylated tails in polysome fractions could mean extended stability during translation,  
23 whereas the newly polyadenylated transcripts in RNP phases may function to move transcripts  
24 out of RNPs and reach the polysomes, thus switching from translational suppression to active

1 translation. To test this, we selected all of the transcripts with newly added poly(A) tails in RNPs  
2 (>50nt poly(A)) and examined their expression during spermiogenesis (**Figure 2D and**  
3 **Supplemental Figure S8**). Indeed, these transcripts' levels decreased in RNP fractions but  
4 increased in polysome fractions from pachytene spermatocytes to round and elongating  
5 spermatids (**Figure 2D, significance in black square marked**). In contrast, the transcripts  
6 without a new poly(A) tail in RNPs (<5bp) stayed in the RNP fractions and remained  
7 translationally repressed (**Figure 2E**). A similar phenomenon was also observed in newly  
8 polyadenylated transcripts in round spermatid RNP fractions, in which the transcripts with  
9 longer poly(A) tail (>50nt) moved out of the RNP to polysome fractions, while those with shorter  
10 poly(A) tails (<5nt) remained in RNPs (**Supplemental Figure S8**). We also found that partial  
11 newly polyadenylated transcripts in RNPs quickly degraded in both RNP and polysome  
12 fractions (**Figure 2D, significance in blue square marked**). These data suggested that the  
13 newly polyadenylated transcripts in the RNPs are either loaded onto the polysomes for active  
14 translation or subject to degradation after translation (**Figure 2D and Supplemental Figure**  
15 **S9**). GO term enrichment analyses revealed that those newly polyadenylated transcripts  
16 encode delayed translated proteins critical for sperm assembly and function, e.g., flagella  
17 development, acrosome assembly, motility, and sperm-egg recognition, etc. (**Figure 2F**). For  
18 example, *Spata6* is expressed as multiple isoforms during spermiogenesis and functions to  
19 form the sperm connecting piece/neck [19]. Once *Spata6* transcripts in the RNP phase gained  
20 the new long poly(A) tails (**Figure 2G, upper panel**), their levels dramatically decreased,  
21 whereas *Spata6* levels in polysome fractions were upregulated with a gradual increase in  
22 poly(A) tail length (**Figure 2G, lower panel**). By examining the terminal sequences of all of the  
23 RNP-enriched transcripts, we found that the transcripts without new poly(A) tails displayed  
24 ~10x higher uridine contents than the transcripts with new poly(A) tails (**Supplemental Figure**

1 **S10D**), implying the function of the uridine-rich motif in polyadenylation. Taken together, our  
2 data suggested that sncRNAs, especially miRNAs, likely mediate deadenylation of transcripts  
3 to be sequestered in RNPs, and only the mRNAs with shorter poly(A) tails can be sequestered  
4 in RNPs. Moreover, gaining longer poly(A) tails is a prerequisite for translocation from RNPs  
5 to polysomes for translation.

6

### 7 **miRNA ablation causes a failure in both poly(A) shortening and RNP phase separation** 8 **in developing spermatids**

9 To further justify the aforementioned proposal, we first employed the *Drosha* cKO mouse  
10 model. *Drosha* encodes a nuclear RNase III enzyme essential for pre-miRNA cleavage [45],  
11 and inactivation of *Drosha* exclusively in the spermatogenic cell lineage through a conditional  
12 knockout (cKO) approach can abolish miRNA production in all developing male germ cells [46].  
13 Although *Drosha* cKO testes contain fewer spermatogenic cells due to germ cell depletion,  
14 there are still some pachytene spermatocytes, and round spermatids remained in the  
15 seminiferous epithelium [46], which we purified and pooled for PAPA-seq analyses.

16 To further validate our notion that miRNAs bind to the 3' UTRs of their target mRNAs to  
17 deadenylate and sequester mRNAs into RNPs, we analyzed *Drosha*-null spermatogenic cells  
18 and examined the effects of miRNA deficiency on the poly(A) length of their target mRNAs.  
19 RNA contents in the RNP fractions of the *Drosha*-null pachytene spermatocytes and round  
20 spermatids were significantly lower than those in the wild-type counterparts (**Figure 2A and**  
21 **3A**), suggesting that these transcripts might fail to accumulate in the RNP granules in the  
22 *Drosha* cKO male germ cells. Moreover, the ratio of gene numbers in RNP vs. polysome  
23 fractions in *Drosha*-null spermatogenic cells decreased by >2 folds when compared to that in  
24 wild-type spermatogenic cells (**Figure 3B**), further suggesting that in *Drosha*-null male germ

1 cells, the transcripts failed to be compartmentalized to RNP granules in the absence of miRNAs.  
2 The fact that the mRNA levels in RNP fractions of *Drosha* cKO cells were drastically reduced  
3 compared to those in RNP fractions of wild-type cells (**Figure 3C**) also seems to support this  
4 possibility because the transcripts that failed to be localized to RNPs undergo massive  
5 degradation, leading to much-reduced RNA levels. The results agree with the phenotype that  
6 we observed in the *Drosha* cKO mice, showing that ablation of miRNAs disturbed the delay  
7 translation in spermiogenesis [47]. Further analysis of the poly(A) in different cell components  
8 showed that the average poly(A) length of RNP-enriched transcripts in *Drosha*-null male germ  
9 cells was significantly longer than those in wild-type cells (**Figure 3D and Supplemental**  
10 **Figure S11**), supporting the notion that miRNAs function to trim poly(A) tails. The increased  
11 average poly(A) length in RNP-enriched transcripts in the *Drosha*-null germ cells most likely  
12 resulted from relative enrichment of longer poly(A) transcripts due to the failed  
13 compartmentalization of the transcripts with trimmed poly(A) tails into the RNP granules in the  
14 absence of miRNAs. To further support this notion, we examined the dynamic poly(A) change  
15 between RNPs and polysomes in the wild-type and the *Drosha*-null round spermatids (**Figure**  
16 **3E**). We found that these *Drosha*-null transcripts failed to be sequestered into RNPs, and  
17 appeared to be stuck in the polysome fractions with very long poly(A) tails (**Figure 3E**). It is  
18 also noteworthy that the partial RNP-enriched transcripts in the wild-type round spermatids  
19 possessed much shorter poly(A) tails, and the same set of transcripts were mostly stuck in  
20 *Drosha*-null RNPs with much longer poly(A) tails (**Figure 3E, significance in black square**  
21 **marked**). The miRNA influence on the deadenylation of transcripts and translocation of the  
22 transcripts, is pertinent. For example, the multiple isoforms of *Spata6* were tailed with longer  
23 poly(A) in polysomes and shorter poly(A) in RNP granules in wild-type round spermatids,  
24 respectively (**Figure 3F**). In sharp contrast, most of these transcripts were degraded in *Drosha*

1 cKO cells, likely due to mRNA degradation in the absence of miRNAs (**Figure 3F**). As expected,  
2 a few transcripts with much longer poly(A) tails remained in the polysome fractions in *Drosha*  
3 cKO cells (**Figure 3F**). Taken together, our data suggest that miRNAs stabilize and facilitate  
4 compartmentalization of their target transcripts to the RNP granules, and miRNA depletion  
5 causes their targets to degrade without being compartmentalized into RNPs. In *Drosha*-null  
6 spermatogenic cells, miRNA deficiency failed to shorten the poly(A) tails of their target RNAs  
7 timely, leading to a degradation or a retention in polysome rather than compartmentalization  
8 into the RNPs.

9

#### 10 **X-linked *miR-506* family miRNAs sequester *Fmr1* mRNAs into RNPs after deadenylation**

11 In our proposed model, mRNAs need to shorten their poly(A) tails through miRNAs-mediated  
12 deadenylation to be sequestered into RNP granules for delayed translation. However, the  
13 *Drosha* cKO model is more likely to experience analysis problems in systematical mRNA  
14 destabilization caused by massive miRNA changes. Therefore, we chose to utilize the *miR-*  
15 *506* family knockout mouse line that we generated [48] to investigate the effects of ablation of  
16 18 miRNAs on their target mRNA, *Fmr1*, emphasizing the poly(A) length and translocation  
17 between RNPs and polysomes. The relationship between poly(A) and miRNAs may be  
18 reflected more precisely by utilizing the single miRNA family knockout model.

19 The *miR-506* family contains 21 miRNAs transcribed from five large miRNA clusters  
20 encompassing a ~ 62kb region and a ~22kb region near *Slitrk2* and *Fmr1*, respectively, on the  
21 X chromosome, most of which are preferentially expressed in the testis [48]. The KO line used  
22 in this study lack 18 abundantly expressed miRNAs out of the 21 miRNAs that belong to the  
23 *miR-506* family [48]. The *miR-506* family targeting *Fmr1*, has been validated using Western  
24 blot *in vivo* [48] and Western blot as well as luciferase assays *in vitro* [49] (**Figure 4A**). We first

1 analyzed *Fmr1* mRNA levels using a semi-quantitative PCR and found no changes in *Fmr1*  
2 levels in KO testes (**Figure 4B**), indicating that *miR-506* did not degrade its target *Fmr1*. We  
3 then determined levels of FMRP, the protein encoded by *Fmr1*, using Western blots (**Figure**  
4 **4C**). To our surprise, FMRP levels were reduced by ~50% in the *miR-506* family KO testes  
5 compared to the wide-type controls (**Figure 4C**). To unveil the differential patterns between  
6 mRNA and protein, we further examined the poly(A) length in the *miR-506* family KO and WT  
7 testes using a poly(A) length PCR assay kit, as described previously [50]. Interestingly, the  
8 average poly(A) length of the *Fmr1* mRNAs appeared to be doubled in the *miR-506* KO testes  
9 (~420nt in WT and ~800nt in KO testes) (**Figure 4D**), suggesting that the poly(A) length  
10 affected protein translation efficiency. The poly(A) pattern of the *miR-506* family KO mice is  
11 consistent with that of the *Drosha* cKO mice, supporting that the functional roles of miRNAs in  
12 the testis is to trim poly(A) tails rather than degrading their targets. Based on our proposed  
13 model, the *Fmr1* mRNA would not be able to be deadenylated and sequestered into RNP  
14 granules in the absence of *miR-506* family miRNAs. Indeed, our data revealed that *Fmr1*  
15 mRNAs levels decreased by ~10% in RNP granules but increased in the polysome fractions  
16 (**Figure 4E and Supplemental Figure S12**). Moreover, the poly(A) tails of *Fmr1* mRNAs in  
17 RNPs are much longer in the *miR-506* family KO testes than those in the wild-type testis  
18 (**Figure 4F**), and no significant difference were observed in the polysome fractions (**Figure**  
19 **4E**). These findings are generally consistent with those found in the *Drosha* cKO testes, where  
20 some mRNAs with longer poly(A) tails still could bind to RNP granules despite massive miRNA  
21 depletion (**Figure 3E and Figure 3F**). Overall, these results strongly support our hypothesis  
22 that miRNAs shorten the poly(A) length of their target mRNAs by deadenylation to sequester  
23 their target mRNAs into RNP granules for delayed translation.

24

## 1 **Discussion**

2           Uncoupling of transcription and translation is prominent during spermiogenesis (round  
3 spermatid differentiation into spermatozoa) [16, 20, 21], oogenesis (maternal transcript  
4 production) [51, 52], preimplantation embryonic development (protein production before  
5 zygotic genome activation) [9, 10, 53], and neuronal cell functions (mRNA synthesis in the cell  
6 body and translation in the axon) [11-13]. Several potential mechanisms have been identified  
7 to achieve uncoupled transcription and translation, including physical sequestration of mRNAs  
8 and proteins in RNP granules [20, 21, 23], 3' UTR length control through alternative  
9 polyadenylation [54, 55], and 3' UTR length-dependent, selective decay of transcripts by UPF  
10 proteins [24, 56]. The poly(A) length has long been known to regulate transcript stability and  
11 translational efficiency [2, 3]. However, investigations into the role of poly(A) length control  
12 have just started to emerge [2, 8, 34, 57]. This is primarily due to a lack of sensitive  
13 methodologies that allow for accurate determination of the full-length poly(A) tail sequences.  
14 The third-generation deep sequencing technologies, e.g., the PacBio and Nanopore  
15 sequencing, allowed us to develop a sensitive method, which we termed PAPA-seq, to  
16 determine the full-length sequences of not only poly(A) tails but also the rest of the entire  
17 transcripts. Using PAPA-seq, we discovered that the average length of the poly(A) tails is ~100  
18 nt. However, it can be as long as 1,000nt in some transcripts in the three spermatogenic cell  
19 types, i.e. the pachytene spermatocytes, and the round and elongating spermatids. The poly(A)  
20 tails are much longer in the round and elongating spermatids than those in the pachytene  
21 spermatocytes. This pattern aligns well with the highest number of transcripts subjected to  
22 delayed translation in the round and elongating spermatids, compared to the pachytene  
23 spermatocytes. Since longer poly(A) tails tend to have enhanced stability and translational

1 efficiency, the peak of poly(A) lengthening in the round and elongating spermatids may reflect  
2 the peak of the delayed translation of those pre-synthesized, RNP-enriched transcripts.

3 Previous reports have shown that PABPs interact with the deadenylation complex  
4 (CCR4-NOT-Tob and PAN2-PAN3) to cause increased mRNA decay and repressed  
5 translation by shortening their poly(A) tails [58, 59]. However, this mechanism targets all  
6 transcripts, causing massive degradation, whereas in developing spermatids with uncoupled  
7 transcription and translation, deadenylation occurs in the transcripts to be sequestered into the  
8 RNP granules. The selective deadenylation must be mediated by a factor with sequence  
9 specificity, e.g., miRNAs. Indeed, our data strongly support such a role of miRNAs. Therefore,  
10 miRNAs appear to play an important role by regulating the poly(A) length through binding their  
11 target mRNAs.

12 In the absence of miRNAs, the mRNAs with pure poly(A) tails cannot be deadenylated  
13 and thus, failed to be compartmentalized into the RNP granules, however, a few transcripts  
14 still bound with RNPs, which may be due to other targeting sncRNAs and/or poly(A) patterns. In  
15 spermatogenic cells, the miRNA only counts for 10% of total sncRNAs [23]. Other sncRNAs,  
16 for example, tsRNA and piRNA, also might sequester mRNAs into RNPs [60, 61]. It is also  
17 noteworthy that the molar ratio between sncRNAs and large RNAs in RNPs is over 100:1,  
18 implying that the excessive amount of sncRNAs may target other regions of mRNAs to  
19 translocate mRNAs [23]. On the other hand, we also examine the poly(A) tail nucleotide  
20 distribution patterns. The cytosine-enriched poly(A) tails still can manage to be phase-  
21 separated into the RNP granules because the cytosine-enriched poly(A) tails have much  
22 reduced PABP binding affinity when compared to the pure poly(A) tails [62] and thus, are more  
23 capable of changing their internal structures to increase hydrophobicity, driving RNP phase  
24 separation independent of miRNA-mediated deadenylation. Overall, the miRNA binding is



1 critical but not the only factor to sequester the transcripts into RNPs. Other factors, such as  
2 RNA binding proteins, non-A nucleotide distribution in poly(A) tails, and other sncRNAs, could  
3 also affect the mRNAs storage in RNPs.

4 Our earlier work has demonstrated that *Drosha* cKO testes display severe  
5 spermatogenic cell depletion with a few remaining pachytene spermatocytes and spermatids  
6 [47]. Therefore, the results observed in *Drosha* KO cells may represent a secondary effect,  
7 that could compromise our conclusion on the regulation of poly(A) length by miRNAs (**Figure**  
8 **3**). To further validate our proposed model on the miRNA-mediated deadenylation and the  
9 subsequent subcellular compartmentalization (i.e. RNPs vs. polysomes), we employed  
10 another KO mouse line, which lacks five large miRNA clusters of the *miR-506* family (**Figure**  
11 **4**). These KO males are subfertile, and their testes display normal spermatogenesis and  
12 histologically indistinguishable from the wild-type control testes [48]. The lack of germ cell  
13 depletion makes this KO mouse line advantageous due to minimal secondary effects.  
14 Interestingly, we found inconsistent levels between *Fmr1* mRNA and protein (**Figure 4A and**  
15 **4B**). Specifically, *Fmr1* protein FMRP levels decrease by half, whereas its mRNA levels remain  
16 unchanged despite their poly(A) tails double their length in the absence of 18 of *Fmr1*-targeting  
17 miRNAs in the KO testes *in vivo* (**Figure 4**). This finding is surprising because it is against the  
18 common belief that miRNA degrade the target mRNAs in somatic cells [63]. However, this  
19 result does support our proposed model in spermiogenesis. Specifically, in the absence of  
20 targeting miRNAs, the mRNAs fail to be deadenylated. Although *Fmr1* mRNAs managed to  
21 get into RNPs, their translation in elongating and elongated spermatids does not occur  
22 normally, leading to a decreased protein level, because of the dysregulated poly(A) tails. This  
23 is in sharp contrast to the wild-type situation that *Fmr1* with shorter poly(A) tails are stored in  
24 RNPs. Taken together, our data support the notion that miRNAs triggers the deadenylation of

1 their targeted mRNAs, and deadenylation of mRNAs effectively controls the delayed protein  
2 translation in spermiogenesis.

3 The function of the chromatoid body (RNPs) is still a source of debate, but the generally  
4 accepted theory is that the chromatoid body (RNPs) determine the transcript fate for  
5 degradation or storage for delayed translation [64-72]. Disturbing the chromatid body  
6 components caused severe defects during the spermiogenesis [73]. However, a definitive link  
7 between poly(A) tails and the dynamic changes between RNP and polysome has been  
8 challenging to prove. In our research, there appears to be a clear poly(A) length association  
9 between the RNP and polysome fractions (**Figure 2**). One of our most intriguing findings is  
10 that the RNP-stored transcripts were re-adenylated and moved to polysome for delayed  
11 translation in later developmental stages (**Figure 2**). This finding is a reasonable implication of  
12 the delayed translation model in spermiogenesis. However, the study is limited by the difficulty  
13 in distinguishing the early stored transcribed RNAs from the nascent RNAs in the re-  
14 polyadenylated RNAs population, considering the active translation in round spermatids. To  
15 support our notion, we refocused our analysis on the newly re-polyadenylated RNAs in the  
16 round spermatids (**Supplemental Figure S8**). Among these transcripts, the mRNA  
17 translocating phenomena are also observed in the elongating spermatids, in which the  
18 transcription is mostly ceased and the transcripts can only move from the RNPs  
19 (**Supplemental Figure S8**). Moreover, we also analyzed the ATAC-seq data to observe the  
20 transcription status [74]. Most of the re-polyadenylated mRNAs' transcription regions are  
21 already condensed in the round and elongating spermatids, supporting that most of the RNAs  
22 are translocated from RNPs other than the nascently transcribed mRNA from nucleus. On the  
23 other hand, we also found that half of the transcripts bound in RNPs are degraded quickly. There  
24 is the dual mechanisms to select the transcripts to degrade or to store for delayed translation.

1 Further researches need to locate the enzyme responsible for the re-polyadenylation and  
2 selective mechanism of the polyadenylation.

3

#### 4 **Conclusion**

5 In summary, we here reported, for the first time, the dynamic changes in poly(A) length  
6 and a critical role of miRNA mediate poly(A) control in the regulation of uncoupled transcription  
7 and translation in the male germ cells undergoing spermiogenesis.

8

9

## 1 **Methods**

### 2 **Animals**

3 All wild-type and KO mice used in this study were on the C57BL/6J background and housed  
4 under specific pathogen-free conditions in a temperature- and humidity-controlled animal  
5 facility at the Nantong University and University of Nevada, Reno, respectively. The animal  
6 protocols was approved by the Animal Care and Use Committee of Nantong University or  
7 University of Nevada, Reno. Male germ cell-specific *Drosha* conditional KO mice  
8 (*Drosha*<sup>loxp/loxp</sup> mice were bred with *Stra8-iCre* mice) and global KO of X linked *miR-506* family  
9 were generated and genotyped at the University of Nevada, Reno as previously described [23,  
10 46, 48, 75].

11

### 12 **Purification of spermatogenic cells**

13 Pachytene spermatocytes, round, and elongating/elongated spermatids were purified from  
14 adult mouse testes using the STA-PUT method [23]. The BSA gradients (0.5-4%) were  
15 prepared in the EKRB buffer (Cat#K-4002, Sigma), supplemented with sodium bicarbonate  
16 (1.26g per 1L), L-glutamine (0.29228g per 1L), Penicillin and Streptomycin mix (Thermo-Fisher,  
17 10,000U per 1L), MEM non-essential amino acids (Thermo-Fisher, 1ml 100X per 1L), MEM  
18 amino acids (20ml 50X per 1L) and cycloheximide (100ng/ml), pH7.2-7.3). Eight testes were  
19 pooled each time for cell purification. After being collected and decapsulated, testes were  
20 placed into 10ml of the EKRB buffer containing 5mg collagenase (Sigma) for 12-min digestion  
21 at 32°C to disperse the testicular cells. Once dispersed, the testicular cells were washed three  
22 times using the EKRB buffer followed by trypsin digestion by incubation in 10ml EKR buffer  
23 containing trypsin (Sigma, 0.25mg/ml) and DNase I (Sigma, 20  $\mu$ g/ml) at 37°C for 12min with  
24 occasional pipetting to facilitate cell dispersion. Thoroughly dispersed testicular cells were

1 washed three times, followed by centrifugation and re-suspension in 10 ml of 0.5% BSA. The  
2 cell suspension was passed through 50  $\mu$ m filters, and the filtrate was saved for loading onto  
3 the STA-PUT apparatus for sedimentation. After 3 h sedimentation at 4 °C, fractions were  
4 collected from the bottom of the sedimentation chamber. A total of 30 fractions of 15 ml each  
5 were collected. After centrifugation, the supernatants were removed, and the cells in each  
6 fraction were re-suspended and the cell purity was determined by microscopy examination  
7 based on cell morphology, as described previously [76]. Fractions containing the same cell  
8 types were pooled followed by centrifugation to collect purified pachytene spermatocytes,  
9 round spermatids, and elongating/elongated spermatids.

10

## 11 **RNP and polysome fractionation**

12 We fractionated the purified spermatogenic cells into RNP, monoribosome, and polyribosome  
13 fractions using a continuous sucrose gradient ultracentrifugation method, as described [23]. In  
14 brief, a continuous sucrose gradient (15%-50%) was prepared by carefully overlaying 15%  
15 sucrose onto 50% sucrose followed by diffusing for 3 hours at 4°C. The 15% and 50% sucrose  
16 solutions were prepared in a lysis buffer (containing 150mM potassium acetate, 5mM  
17 magnesium acetate, 2mM DTT, protease inhibitor cocktail (Sigma, 1X), RNase inhibitor  
18 cocktail (Sigma, 1X), cycloheximide (100ng/ml), and 50mM HEPES, pH 7.5). Freshly purified  
19 pachytene spermatocytes, round spermatids, and elongating/elongated spermatids were  
20 homogenized in the lysis buffer freshly supplemented with 0.5% Triton X-100 and 0.25 M  
21 sucrose. The homogenates were centrifuged at ~500g for 15min at 4°C to remove tissue  
22 debris, unbroken cells, and nuclei. The supernatant was loaded onto the continuous 15-50%  
23 sucrose gradient followed by centrifugation at 150,000g (35,000rpm) for 3h at 4°C. A tiny hole

1 was punched gently at the bottom of the tubes for fraction collection. Twenty-four 500- $\mu$ l  
2 fractions were collected followed by UV spectrometer measurement for OD<sub>254</sub>.

3

#### 4 **PAPA-Seq**

5 Total RNA from all samples (cell sample RIN>8, polysome sample RIN>8, RNP not applicable,  
6 sperm sample RIN>3 ) was centrifuged to discard inhibitor pellet. mRNA was purified using  
7 Dynabeads® mRNA Purification Kit (life technology) according to the manufacturer's  
8 instruction. mRNA was checked by 2100 Bioanalyzer RNA picochip to ensure integrity.  
9 Qualified mRNA was firstly denatured at 65°C and chill on ice, and then added with 1× GTP-  
10 ITP mix(0.5 mM each ) and 1× NEB buffer 2, 2U poly(U) polymerase, and 40U RNase inhibitor,  
11 followed by incubation at 37°C for 1hour. The mRNAs tailed with GTP and ITPs was then  
12 purified by 1.8X volumes RNA cleanup Ampure beads (Catalog NO. A63987, Beckmann  
13 Coulter) and eluted in 10.5 $\mu$ l H<sub>2</sub>O, followed by reverse transcription. 2 $\mu$ l 3'CDS primer (10 $\mu$ M)  
14 (5'-AAGCAGTGGTATCAACGCAGAGTACNNNNNNCCCCCCCCCCCCTTT-3') was added  
15 into the purified GI-tailed mRNA, and incubated at 72°C for 3min, followed by cooling down to  
16 42°C at the 0.1°C/s speed, then a master mix containing iso-template switch oligo (5'-  
17 AAGCAGTGGTATCAACGCAGAGTACATrGrG+G-3', where +G indicates locked nucleotide),  
18 SSII superscript transcriptase, 1× first strand buffer, DTT, dNTP, and RNase inhibitor was  
19 added. The reaction was incubated at 42°C for 90 minutes, and stopped by incubating at 70°C  
20 for 10 minutes. The full-length mRNA library reaction was set up with the following reagents: 1  
21 × KAPA HiFi mater mix, PCR primers (5'-AAGCAGTGGTATCAACGCAGAGT-3'), and 10  $\mu$ l  
22 of synthesized cDNA. The PCR conditions were as follows: initial denaturation at 95°C for 2  
23 min, followed by 15-18 cycles of amplification (denaturation at 98°C for 20 s, annealing at 65°C

1 for 15 s, and elongation 72°C for 4 min) with a final elongation at 72°C for 7 min. The amplified  
2 library was then purified with 1 × and 0.4 × Ampure XP DNA Beads separately and  
3 resuspended in 42 μl H<sub>2</sub>O. One microliter of the equal mass mixed library was diluted 5 times  
4 and one microliter was checked on High sensitivity DNA chip.

5

## 6 **PacBio sequencing**

7 The purified PCR libraries were submitted to the Genomics core facility of MDC for PacBio  
8 sequencing. Sequencing libraries were prepared using the PacBio Amplicon Template  
9 Preparation and Sequencing Protocol (PN 100-081-600) and the SMRTbell Template Prep Kit  
10 1.0-SPv3 according to the manufacturer's guidelines. Sequencing on the Sequel was  
11 performed in Diffusion mode using the Sequel Binding and Internal Ctrl Kit 2.0. Every library  
12 was sequenced on one SMRT Cells 1 M v.2.1 with a 1 × 1200 min movie. Circular Consensus  
13 Sequence (CCS) reads were generated within the SMRT Link browser 5.0 (minimum full pass  
14 of three and minimum predicted accuracy of 90).

15

## 16 **Bioinformatic analyses of PAPA-Seq data**

17

### 18 Full-Length Isoforms detection

19 First, we used NCBI BLAST (the version is 2.2.28+ with parameters "-outfmt 7 -word\_size 5")  
20 to map 5' and 3' primers to CCS reads, then used in house Perl script to parse standard pair  
21 of 5' and 3' primers CCS as the full-length isoform. Next, we trimmed the primer sequence and  
22 reported the UMI in each full-length isoform. Finally, each isoform was oriented from 5' to 3'  
23 end.

24

## 1 Poly(A) tails detection

2 We developed a special modified sliding window algorithmic approaches to accurately and  
3 error-tolerantly detect Poly(A) tails. For example, we have a following poly(A) tail:  
4 TCGAAATCAAGAAAAACAAAAAA, we listed all the windows without overlap (from 3' to 5':  
5 AAAAAA, AAAAAC, AAG, AAATC, TCG), and obtained the percentage of A in each window  
6 (100%, 83.33%, 66.66%, 60%, 0%), which were defined as the parameter w1. Then using  
7 sliding window started from the 3' end, we can get the percentage of A in total window, which  
8 were defined as the parameter w2. Based on the empirically optimized and benchmarked  
9 against a set of manually annotated poly(A) tail estimated from UHRR datasets, the w1 and  
10 w2 parameters were set to  $w1 \geq 50\%$  and  $w2 \geq 70\%$ . As for the example above, we listed all  
11 the sliding region here (AAAAAA w1=100% w2=100%, AAAAACAAAAAA w1=83.33%  
12 w2=91.66%, AAGAAAAACAAAAAA w1=66.66% w2=80%, AAATCAAGAAAAACAAAAAA  
13 w1=60% w2=80%, TCGAAATCAAGAAAAACAAAAAA w1=0% w2=69.56%), so we can define  
14 the poly(A) is AAATCAAGAAAAACAAAAAA.

15

## 16 Quantification and gene assignment

17 After Poly(A) tails detection and trimming, the remaining fraction of each isoform was mapped  
18 to mm10 genome using GMAP (version is 2018-05-30) with parameters '-f samse -n 0 --min-  
19 intronlength 9 --max-intronlength-middle 500000 --max-intron length-ends 10000 --trim-end-  
20 exons 12'. And then using cDNA\_Cupcake ([https://github.com/Magdoll/cDNA\\_Cupcake](https://github.com/Magdoll/cDNA_Cupcake))  
21 python script collapse\_isoforms\_by\_sam.py to collapse all samples isoforms, based on  
22 collapsed output, we are using in house Perl script to get the isoform expression quantity in  
23 each sample. After collapse, nonredundant isoforms were detected using cuffcompare (version  
24 v2.0.2) assigned to Ensemble mm10 annotation gene models.



1

## 2 Isoforms coding frame prediction and UTR detection

3 CDS coding frame and UTR region were predicted using TransDecoder [77] from the  
4 nonredundant isoforms, the predicted CDS were further confirmed using NR and Pfam  
5 database.

6

## 7 In silico miRNA target prediction

8 Computational prediction of miRNA targets is a critical initial step in identifying miRNA: mRNA  
9 target interactions for experimental validation. In order to find possible targets, multiple  
10 software was used. The intersection targets with appropriate filter conditions such as MFE  
11 scores were taking for the further analysis. We used miRanda [78] (with parameters' -en -20 -  
12 strict') and TargetScan [79] (with default parameter) to get the target genes of miRNA,  
13 extracted intersection or union of the target genes as final prediction result.

14

## 15 Statistical analyses

16 Both student's t-test and Wilcoxon rank sum test (a non-parametric or distribution-free test)  
17 were used for statistical analyses. The majority of the data followed a lognormal distribution.  
18 The student's t-test was also performed on the logarithm data.

19

## 20 **Declarations**

21

## 22 **Acknowledgements**

23 This work was supported by grants from the National Key Research and Development Program  
24 of China (No. 2018YFC1003500 to F.S), the National Natural Science Foundation of China

1 (Grant No.81430027 and 81671510 to F.S.), the Science, Technology and Innovation  
2 Commission of Shenzhen Municipality (No: JS GG20170824152728492). The work on *Drosha*  
3 and X linked miR-506 family KO mice were supported by grants from the NIH (HD071736  
4 and HD085506 to WY) and the Templeton Foundation (PID: 61174 to WY). The funders had  
5 no role in the design of the study, data collection, analysis, and interpretation, or in writing the  
6 manuscript.

7

## 8 **Funding**

9 This work was supported by grants from the National Key Research and Development Program  
10 of China (No. 2018YFC1003500 to F.S), the National Natural Science Foundation of China  
11 (Grant No.81430027 and 81671510 to F.S.), the Science, Technology, and Innovation  
12 Commission of Shenzhen Municipality (No: JS GG20170824152728492), National Natural  
13 Science Foundation of China Grants (Grant No. 81801523 to Ying Zhang). The work on  
14 *Drosha* and X linked miR-506 family KO mice was supported by grants from the  
15 NIH (HD071736 and HD085506 to WY) and the Templeton Foundation (PID: 61174 to WY).  
16 The funders had no role in the design of the study, data collection, analysis, and interpretation,  
17 or in writing the manuscript.

18

## 19 **Availability of Data and Materials**

20 The original data of both large and small RNA-seq data have been deposited into the CNGB  
21 database and can be accessed using the accession numbers CNS0189582. The code has  
22 been uploaded to GitHub ([https://github.com/shizhuoxing/BGI-Full-Length-RNA-Analysis-  
23 Pipeline](https://github.com/shizhuoxing/BGI-Full-Length-RNA-Analysis-Pipeline)).

24

1 **Author contributions**

2 C.T., W. Y. F. S. and Y.Z supervise the entire study. Y.Z. and C.L. performed cell purification,  
3 fractionation, M.G. performed RNA isolation, library construction and sequencing. Z.W. and  
4 S.C. performed all the experiments involving the X linked *miR-506* family KO mice. C.T. and  
5 Z.S. conducted all the bioinformatics analyses. W.Y. provided purified germ cells from the  
6 *Drosha* cKO and the X linked *miR-506* family knockout mice. All participated in data analyses.  
7 C.T. and W.Y. wrote the manuscript. Z.W. edited the manuscript. All authors read and  
8 approved the final manuscript.

9

10 **Competing interest**

11 The authors declare no competing interests.

12

13 Ethical approval and consent to participate

14

15

## 1 REFERENCES

- 2
- 3 1. Keene JD: **RNA regulons: coordination of post-transcriptional events.** *Nat Rev*
- 4 *Genet* 2007, **8**:533-543.
- 5 2. Nicholson AL, Pasquinelli AE: **Tales of Detailed Poly(A) Tails.** *Trends Cell Biol* 2019,
- 6 **29**:191-200.
- 7 3. Goldstrohm AC, Wickens M: **Multifunctional deadenylase complexes diversify**
- 8 **mRNA control.** *Nat Rev Mol Cell Biol* 2008, **9**:337-344.
- 9 4. Elkon R, Ugalde AP, Agami R: **Alternative cleavage and polyadenylation: extent,**
- 10 **regulation and function.** *Nat Rev Genet* 2013, **14**:496-506.
- 11 5. Ivshina M, Lasko P, Richter JD: **Cytoplasmic polyadenylation element binding**
- 12 **proteins in development, health, and disease.** *Annu Rev Cell Dev Biol* 2014, **30**:393-
- 13 415.
- 14 6. Wormington M: **Unmasking the role of the 3' UTR in the cytoplasmic**
- 15 **polyadenylation and translational regulation of maternal mRNAs.** *Bioessays* 1994,
- 16 **16**:533-535.
- 17 7. Richter JD: **Cytoplasmic polyadenylation in development and beyond.** *Microbiol*
- 18 *Mol Biol Rev* 1999, **63**:446-456.
- 19 8. Morgan M, Much C, DiGiacomo M, Azzi C, Ivanova I, Vitsios DM, Pistollic J, Collier P,
- 20 Moreira PN, Benes V, et al: **mRNA 3' uridylation and poly(A) tail length sculpt the**
- 21 **mammalian maternal transcriptome.** *Nature* 2017, **548**:347-351.
- 22 9. Lim J, Lee M, Son A, Chang H, Kim VN: **mTAIL-seq reveals dynamic poly(A) tail**
- 23 **regulation in oocyte-to-embryo development.** *Genes Dev* 2016, **30**:1671-1682.
- 24 10. Gohin M, Fournier E, Dufort I, Sirard MA: **Discovery, identification and sequence**
- 25 **analysis of RNAs selected for very short or long poly A tail in immature bovine**
- 26 **oocytes.** *Mol Hum Reprod* 2014, **20**:127-138.
- 27 11. Norbury CJ: **Cytoplasmic RNA: a case of the tail wagging the dog.** *Nat Rev Mol Cell*
- 28 *Biol* 2013, **14**:643-653.
- 29 12. Andreassi C, Riccio A: **To localize or not to localize: mRNA fate is in 3'UTR ends.**
- 30 *Trends Cell Biol* 2009, **19**:465-474.
- 31 13. Richter JD: **Think globally, translate locally: what mitotic spindles and neuronal**
- 32 **synapses have in common.** *Proc Natl Acad Sci U S A* 2001, **98**:7069-7071.
- 33 14. Hilgers V: **Alternative polyadenylation coupled to transcription initiation: Insights**
- 34 **from ELAV-mediated 3' UTR extension.** *RNA Biol* 2015, **12**:918-921.
- 35 15. Curinha A, Oliveira Braz S, Pereira-Castro I, Cruz A, Moreira A: **Implications of**
- 36 **polyadenylation in health and disease.** *Nucleus* 2014, **5**:508-519.
- 37 16. Idler RK, Yan W: **Control of messenger RNA fate by RNA-binding proteins: an**
- 38 **emphasis on mammalian spermatogenesis.** *J Androl* 2012, **33**:309-337.
- 39 17. Kashiwabara S, Nakanishi T, Kimura M, Baba T: **Non-canonical poly(A) polymerase**
- 40 **in mammalian gametogenesis.** *Biochim Biophys Acta* 2008, **1779**:230-238.
- 41 18. Hermo L, Pelletier RM, Cyr DG, Smith CE: **Surfing the wave, cycle, life history, and**
- 42 **genes/proteins expressed by testicular germ cells. Part 2: changes in spermatid**
- 43 **organelles associated with development of spermatozoa.** *Microsc Res Tech* 2010,
- 44 **73**:279-319.
- 45 19. Yuan S, Stratton CJ, Bao J, Zheng H, Bhetwal BP, Yanagimachi R, Yan W: **Spata6 is**
- 46 **required for normal assembly of the sperm connecting piece and tight head-tail**
- 47 **conjunction.** *Proc Natl Acad Sci U S A* 2015, **112**:E430-439.

- 1 20. Bettgowda A, Wilkinson MF: **Transcription and post-transcriptional regulation of spermatogenesis.** *Philos Trans R Soc Lond B Biol Sci* 2010, **365**:1637-1651.
- 2
- 3 21. Braun RE: **Post-transcriptional control of gene expression during spermatogenesis.** *Semin Cell Dev Biol* 1998, **9**:483-489.
- 4
- 5 22. Kotaja N, Sassone-Corsi P: **The chromatoid body: a germ-cell-specific RNA-processing centre.** *Nat Rev Mol Cell Biol* 2007, **8**:85-90.
- 6
- 7 23. Zhang Y, Tang C, Yu T, Zhang R, Zheng H, Yan W: **MicroRNAs control mRNA fate by compartmentalization based on 3' UTR length in male germ cells.** *Genome Biol* 2017, **18**:105.
- 8
- 9
- 10 24. Bao J, Vitting-Seerup K, Waage J, Tang C, Ge Y, Porse BT, Yan W: **UPF2-Dependent Nonsense-Mediated mRNA Decay Pathway Is Essential for Spermatogenesis by Selectively Eliminating Longer 3'UTR Transcripts.** *PLoS Genet* 2016, **12**:e1005863.
- 11
- 12 25. Tang C, Klukovich R, Peng H, Wang Z, Yu T, Zhang Y, Zheng H, Klungland A, Yan W: **ALKBH5-dependent m6A demethylation controls splicing and stability of long 3'-UTR mRNAs in male germ cells.** *Proc Natl Acad Sci U S A* 2018, **115**:E325-E333.
- 13
- 14 26. Tang C, Xie Y, Yu T, Liu N, Wang Z, Woolsey RJ, Tang Y, Zhang X, Qin W, Zhang Y, et al: **m(6)A-dependent biogenesis of circular RNAs in male germ cells.** *Cell Res* 2020, **30**:211-228.
- 15
- 16 27. Kashiwabara S-Isi, Noguchi J, Zhuang T, Ohmura K, Honda A, Sugiura S, Miyamoto K, Takahashi S, Inoue K, Ogura A, Baba T: **Regulation of Spermatogenesis by Testis-Specific, Cytoplasmic Poly(A) Polymerase TPAP.** *Science (New York, NY)* 2002, **298**:1999-2002.
- 17
- 18 28. Yanagiya A, Delbes G, Svitkin YV, Robaire B, Sonenberg N: **The poly(A)-binding protein partner Paip2a controls translation during late spermiogenesis in mice.** *J Clin Invest* 2010, **120**:3389-3400.
- 19
- 20 29. Kashiwabara SI, Tsuruta S, Okada K, Yamaoka Y, Baba T: **Adenylation by testis-specific cytoplasmic poly(A) polymerase, PAPOLB/TPAP, is essential for spermatogenesis.** *J Reprod Dev* 2016, **62**:607-614.
- 21
- 22 30. Kleene KC, Wang MY, Cutler M, Hall C, Shih D: **Developmental expression of poly(A) binding protein mRNAs during spermatogenesis in the mouse.** *Mol Reprod Dev* 1994, **39**:355-364.
- 23
- 24 31. Chang H, Lim J, Ha M, Kim VN: **TAIL-seq: genome-wide determination of poly(A) tail length and 3' end modifications.** *Mol Cell* 2014, **53**:1044-1052.
- 25
- 26 32. Subtelny AO, Eichhorn SW, Chen GR, Sive H, Bartel DP: **Poly(A)-tail profiling reveals an embryonic switch in translational control.** *Nature* 2014, **508**:66-71.
- 27
- 28 33. Legnini I, Alles J, Karaiskos N, Ayoub S, Rajewsky N: **FLAM-seq: full-length mRNA sequencing reveals principles of poly(A) tail length control.** *Nature Methods* 2019, **16**:879-886.
- 29
- 30 34. Legnini I, Alles J, Karaiskos N, Ayoub S, Rajewsky N: **FLAM-seq: full-length mRNA sequencing reveals principles of poly(A) tail length control.** *Nat Methods* 2019, **16**:879-886.
- 31
- 32 35. Jia J, Yao P, Arif A, Fox PL: **Regulation and dysregulation of 3'UTR-mediated translational control.** *Curr Opin Genet Dev* 2013, **23**:29-34.
- 33
- 34 36. Nb, C. KK, Distel RJ, Hecht: **Translational regulation and deadenylation of a protamine mRNA during spermiogenesis in the mouse.** *Developmental biology* 1984, **105**.
- 35
- 36

- 1 37. Kc, Kleene: **Poly(A) shortening accompanies the activation of translation of five**  
2 **mRNAs during spermiogenesis in the mouse.** *Development (Cambridge, England)*  
3 1989, **106**.
- 4 38. Iguchi N, Tobias JW, Hecht NB: **Expression profiling reveals meiotic male germ cell**  
5 **mRNAs that are translationally up- and down-regulated.** *Proc Natl Acad Sci U S A*  
6 2006, **103**:7712-7717.
- 7 39. Kotaja N, Lin H, Parvinen M, Sassone-Corsi P: **Interplay of PIWI/Argonaute protein**  
8 **MIWI and kinesin KIF17b in chromatoid bodies of male germ cells.** *J Cell Sci* 2006,  
9 **119**:2819-2825.
- 10 40. Fabian MR, Cieplak MK, Frank F, Morita M, Green J, Srikumar T, Nagar B, Yamamoto  
11 T, Raught B, Duchaine TF, Sonenberg N: **miRNA-mediated deadenylation is**  
12 **orchestrated by GW182 through two conserved motifs that interact with CCR4-**  
13 **NOT.** *Nature Structural & Molecular Biology* 2011, **18**:1211-1217.
- 14 41. Eulalio A, Huntzinger E, Nishihara T, Rehwinkel J, Fauser M, Izaurralde E:  
15 **Deadenylation is a widespread effect of miRNA regulation.** *RNA* 2009, **15**:21-32.
- 16 42. Eichhorn SW, Subtelny AO, Kronja I, Kwasnieski JC, Orr-Weaver TL, Bartel DP: **mRNA**  
17 **poly(A)-tail changes specified by deadenylation broadly reshape translation in**  
18 **Drosophila oocytes and early embryos.** *eLife* 2016, **5**:e16955-e16955.
- 19 43. Chen C-YA, Zheng D, Xia Z, Shyu A-B: **Ago-TNRC6 triggers microRNA-mediated**  
20 **decay by promoting two deadenylation steps.** *Nature Structural & Molecular Biology*  
21 2009, **16**:1160-1166.
- 22 44. Peruquetti RL: **Perspectives on mammalian chromatoid body research.** *Anim*  
23 *Reprod Sci* 2015, **159**:8-16.
- 24 45. Han J, Lee Y, Yeom KH, Nam JW, Heo I, Rhee JK, Sohn SY, Cho Y, Zhang BT, Kim  
25 VN: **Molecular basis for the recognition of primary microRNAs by the Drosha-**  
26 **DGCR8 complex.** *Cell* 2006, **125**:887-901.
- 27 46. Wu Q, Song R, Ortogero N, Zheng H, Evanoff R, Small CL, Griswold MD, Namekawa  
28 SH, Royo H, Turner JM, Yan W: **The RNase III enzyme DROSHA is essential for**  
29 **microRNA production and spermatogenesis.** *J Biol Chem* 2012, **287**:25173-25190.
- 30 47. Wu Q, Song R, Ortogero N, Zheng H, Evanoff R, Small CL, Griswold MD, Namekawa  
31 SH, Royo H, Turner JM, Yan W: **The RNase III Enzyme DROSHA Is Essential for**  
32 **MicroRNA Production and Spermatogenesis.** *The Journal of Biological Chemistry*  
33 2012, **287**:25173-25190.
- 34 48. Wang Z, Xie Y, Wang Y, Morris D, Wang S, Oliver D, Yuan S, Zayac K, Bloomquist S,  
35 Zheng H, Yan W: **X-linked miR-506 family miRNAs promote FMRP expression in**  
36 **mouse spermatogonia.** *EMBO reports* 2020, **21**:e49024.
- 37 49. Ramaiah M, Tan K, Plank T-DM, Song H-W, Dumdie JN, Jones S, Shum EY, Sheridan  
38 SD, Peterson KJ, Gromoll J, et al: **A microRNA cluster in the Fragile-X region**  
39 **expressed during spermatogenesis targets FMR1.** *EMBO reports* 2019, **20**:e46566.
- 40 50. Kusov YY, Shatirishvili G, Dzagurov G, Gauss-Müller V: **A new G-tailing method for**  
41 **the determination of the poly(A) tail length applied to hepatitis A virus RNA.**  
42 *Nucleic Acids Research* 2001, **29**:e57-e57.
- 43 51. Sha QQ, Zhang J, Fan HY: **A story of birth and death: mRNA translation and**  
44 **clearance at the onset of maternal-to-zygotic transition in mammalsdagger.** *Biol*  
45 *Reprod* 2019, **101**:579-590.
- 46 52. Bettgowda A, Smith GW: **Mechanisms of maternal mRNA regulation: implications**  
47 **for mammalian early embryonic development.** *Front Biosci* 2007, **12**:3713-3726.

- 1 53. Cui XS, Kim NH: **Maternally derived transcripts: identification and characterisation**  
2 **during oocyte maturation and early cleavage.** *Reprod Fertil Dev* 2007, **19**:25-34.
- 3 54. Mayr C: **Regulation by 3'-Untranslated Regions.** *Annu Rev Genet* 2017, **51**:171-194.
- 4 55. Di Giammartino DC, Nishida K, Manley JL: **Mechanisms and consequences of**  
5 **alternative polyadenylation.** *Mol Cell* 2011, **43**:853-866.
- 6 56. Boehm V, Haberman N, Ottens F, Ule J, Gehring NH: **3' UTR length and messenger**  
7 **ribonucleoprotein composition determine endocleavage efficiencies at**  
8 **termination codons.** *Cell Rep* 2014, **9**:555-568.
- 9 57. Liu Y, Nie H, Liu H, Lu F: **Poly(A) inclusive RNA isoform sequencing (PAlso-seq)**  
10 **reveals wide-spread non-adenosine residues within RNA poly(A) tails.** *Nat*  
11 *Commun* 2019, **10**:5292.
- 12 58. Flamand MN, Wu E, Vashisht A, Jannot G, Keiper BD, Simard MJ, Wohlschlegel J,  
13 Duchaine TF: **Poly(A)-binding proteins are required for microRNA-mediated**  
14 **silencing and to promote target deadenylation in C. elegans.** *Nucleic Acids Res*  
15 2016, **44**:5924-5935.
- 16 59. Yi H, Park J, Ha M, Lim J, Chang H, Kim VN: **PABP Cooperates with the CCR4-NOT**  
17 **Complex to Promote mRNA Deadenylation and Block Precocious Decay.** *Mol Cell*  
18 2018, **70**:1081-1088 e1085.
- 19 60. Kim HK: **Transfer RNA-Derived Small Non-Coding RNA: Dual Regulator of Protein**  
20 **Synthesis.** *Molecules and cells* 2019, **42**:687-692.
- 21 61. Vourekas A, Zheng Q, Alexiou P, Maragkakis M, Kirino Y, Gregory BD, Mourelatos Z:  
22 **Mili and Miwi target RNA repertoire reveals piRNA biogenesis and function of**  
23 **Miwi in spermiogenesis.** *Nature structural & molecular biology* 2012, **19**:773-781.
- 24 62. Lunde BM, Moore C, Varani G: **RNA-binding proteins: modular design for efficient**  
25 **function.** *Nat Rev Mol Cell Biol* 2007, **8**:479-490.
- 26 63. Shyu AB, Wilkinson MF, van Hoof A: **Messenger RNA regulation: to translate or to**  
27 **degrade.** *Embo j* 2008, **27**:471-481.
- 28 64. Piccolo LL, Corona D, Onorati MC: **Emerging roles for hnRNPs in post-**  
29 **transcriptional regulation: what can we learn from flies?** *Chromosoma* 2014,  
30 **123**:515-527.
- 31 65. Matsui M, Horiguchi H, Kamma H, Fujiwara M, Ohtsubo R, Ogata T: **Testis- and**  
32 **developmental stage-specific expression of hnRNP A2/B1 splicing isoforms,**  
33 **B0a/b.** *Biochimica et biophysica acta* 2000, **1493**:33-40.
- 34 66. Hofweber M, Dormann D: **Friend or foe-Post-translational modifications as**  
35 **regulators of phase separation and RNP granule dynamics.** *J Biol Chem* 2019,  
36 **294**:7137-7150.
- 37 67. Keeling KM, Salas-Marco J, Osherovich LZ, Bedwell DM: **Tpa1p is part of an mRNP**  
38 **complex that influences translation termination, mRNA deadenylation, and mRNA**  
39 **turnover in Saccharomyces cerevisiae.** *Mol Cell Biol* 2006, **26**:5237-5248.
- 40 68. Moser JJ, Fritzler MJ: **Relationship of other cytoplasmic ribonucleoprotein bodies**  
41 **(cRNPB) to GW/P bodies.** *Adv Exp Med Biol* 2013, **768**:213-242.
- 42 69. Moser JJ, Fritzler MJ: **Cytoplasmic ribonucleoprotein (RNP) bodies and their**  
43 **relationship to GW/P bodies.** *Int J Biochem Cell Biol* 2010, **42**:828-843.
- 44 70. Ostareck-Lederer A, Ostareck DH: **Precision mechanics with multifunctional tools:**  
45 **how hnRNP K and hnRNPs E1/E2 contribute to post-transcriptional control of**  
46 **gene expression in hematopoiesis.** *Curr Protein Pept Sci* 2012, **13**:391-400.
- 47 71. Meikar O, Da Ros M, Korhonen H, Kotaja N: **Chromatoid body and small RNAs in**  
48 **male germ cells.** *Reproduction (Cambridge, England)* 2011, **142**:195-209.

- 1 72. Kotaja N, Sassone-Corsi P: **The chromatoid body: a germ-cell-specific RNA-**  
2 **processing centre.** *Nature Reviews Molecular Cell Biology* 2007, **8**:85-90.
- 3 73. Vasileva A, Tiedau D, Firooznia A, Müller-Reichert T, Jessberger R: **Tdrd6 Is Required**  
4 **for Spermiogenesis, Chromatoid Body Architecture, and Regulation of miRNA**  
5 **Expression.** *Current Biology* 2009, **19**:630-639.
- 6 74. Tang C, Klukovich R, Peng H, Wang Z, Yu T, Zhang Y, Zheng H, Klungland A, Yan W:  
7 **ALKBH5-dependent m6A demethylation controls splicing and stability of long 3'-**  
8 **UTR mRNAs in male germ cells.** *Proceedings of the National Academy of Sciences*  
9 *of the United States of America* 2018, **115**:E325-E333.
- 10 75. Wang Z, Wang Y, Wang S, Gorzalski AJ, McSwiggin H, Yu T, Castaneda-Garcia K,  
11 Prince B, Wang H, Zheng H, Yan W: **Efficient genome editing by CRISPR-**  
12 **Mb3Cas12a in mice.** *J Cell Sci* 2020, **133**.
- 13 76. Morgan M, Kabayama Y, Much C, Ivanova I, Di Giacomo M, Auchynnikava T, Monahan  
14 JM, Vitsios DM, Vasiliauskaite L, Comazzetto S, et al: **A programmed wave of**  
15 **uridylation-primed mRNA degradation is essential for meiotic progression and**  
16 **mammalian spermatogenesis.** *Cell Res* 2019, **29**:221-232.
- 17 77. Oakley TH, Alexandrou MA, Ngo R, Pankey MS, Churchill CK, Chen W, Lopker KB:  
18 **Osiris: accessible and reproducible phylogenetic and phylogenomic analyses**  
19 **within the Galaxy workflow management system.** *BMC Bioinformatics* 2014, **15**:230.
- 20 78. John B, Enright AJ, Aravin A, Tuschl T, Sander C, Marks DS: **Human MicroRNA**  
21 **targets.** *PLoS Biol* 2004, **2**:e363.
- 22 79. Agarwal V, Bell GW, Nam JW, Bartel DP: **Predicting effective microRNA target sites**  
23 **in mammalian mRNAs.** *Elife* 2015, **4**.
- 24
- 25
- 26
- 27
- 28
- 29



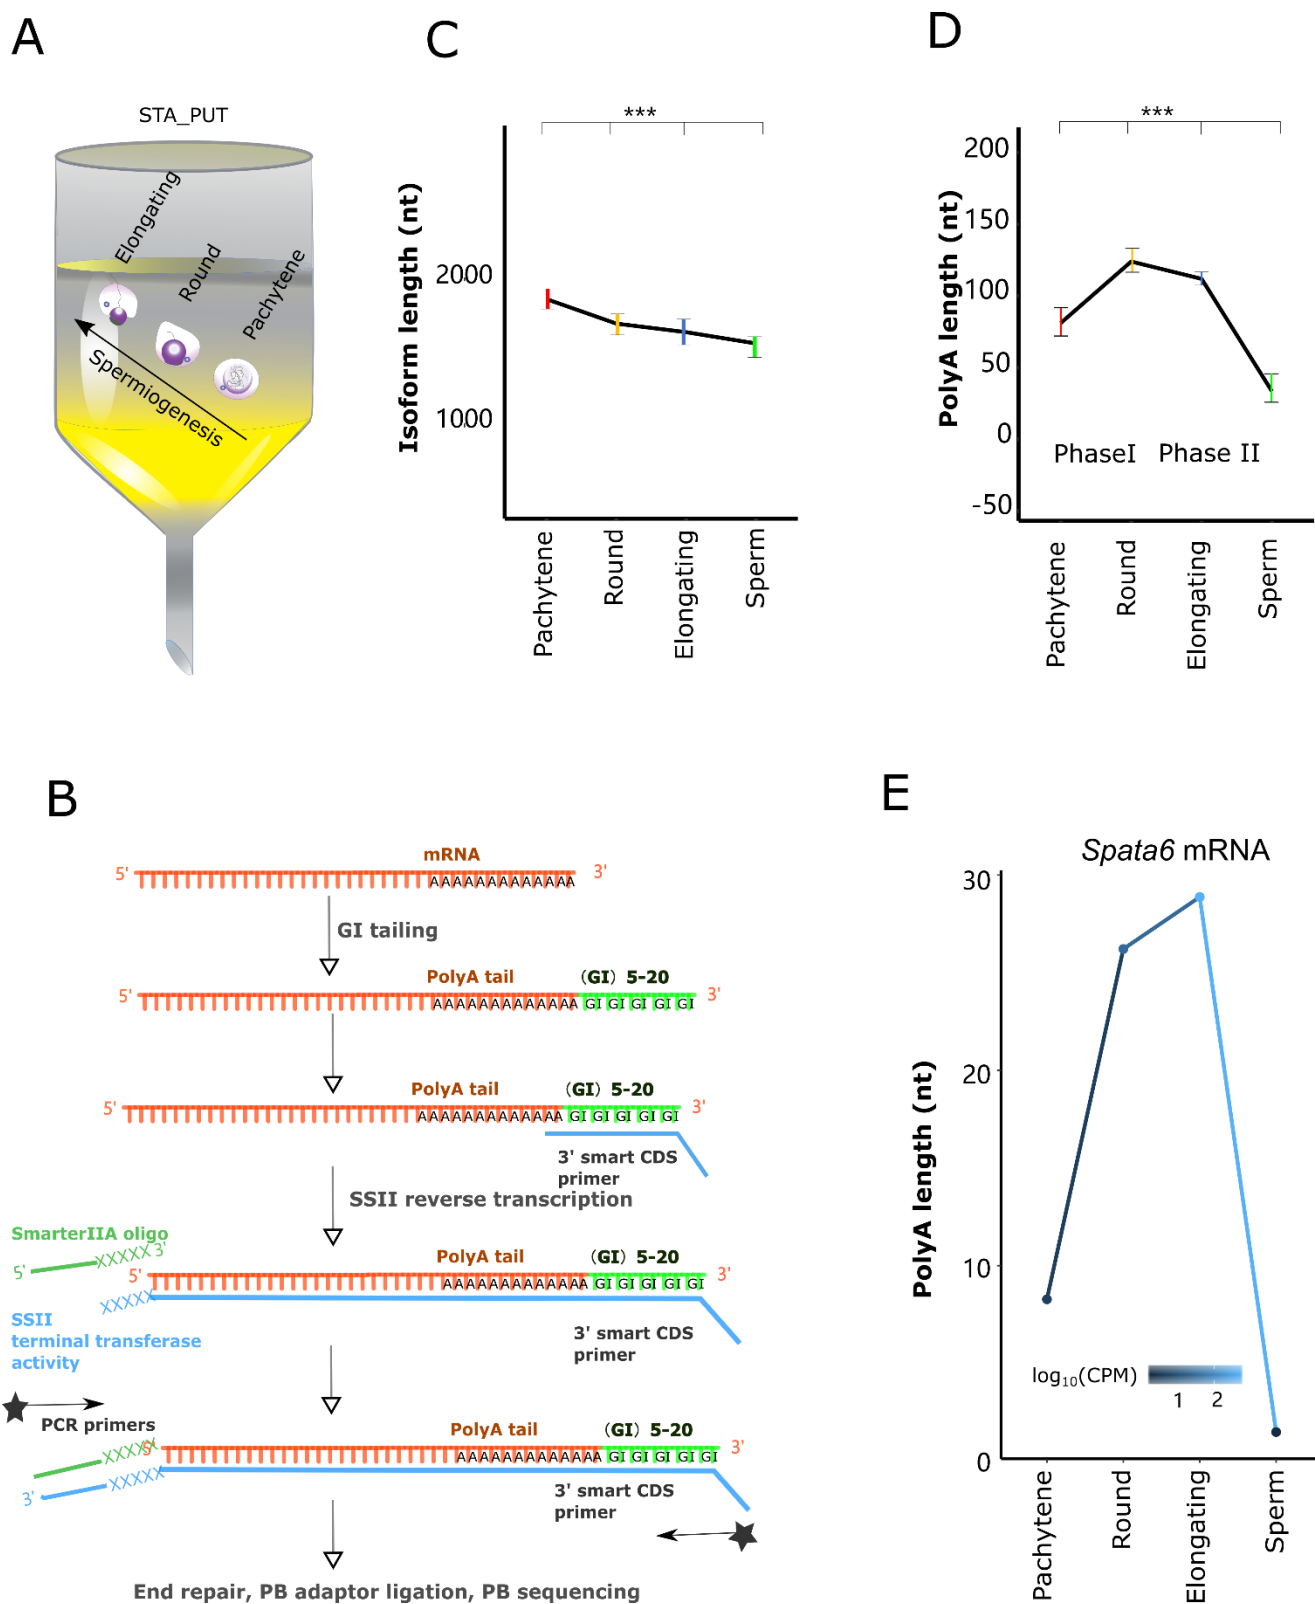

1 End repair, PB adaptor ligation, PB sequencing  
 2 **Figure 1. Dynamic poly(A) length control during spermiogenesis as revealed by full-**  
 3 **length poly(A) deep sequencing. (A)** A gravity sedimentation-based STA-PUT method used

1 to purify pachytene spermatocytes, round spermatids and elongating spermatids in the present  
2 study. (B) Schematic illustration of PAPA-seq workflow. In brief, the poly(U) polymerase  
3 attaches poly(GI) tails to the very end of the poly(A) tail of RNAs. The modified poly(C) primer  
4 with adaptor sequence anneals to the poly(GI) tails. The reverse transcription, initiating from  
5 the start sites of poly(GI) tails, generates the cDNAs covering the full-length poly(A) tails. The  
6 other chemically modified adaptor is attached to the end of the cDNAs (i.e., corresponding to  
7 the 5' ends of the RNA) by the template-switching activity of MMLV reverse transcriptase. PCR  
8 is then performed to amplify the cDNAs to a sufficient amount for PacBio library construction.  
9 (C) Average lengths of transcripts in pachytene spermatocytes, round and elongating  
10 spermatids, as well as spermatozoa. \*\*\*:  $p < 0.01$ , log t-test, number of transcripts  $> 20,000$ .  
11 Data were based on samples from two independent preparations with 3-6 mice in each, plus  
12 two technical replicates. (D) Line plot showing the average poly(A) length in pachytene  
13 spermatocytes, round and elongating spermatids, as well as spermatozoa. \*\*\*:  $p < 0.01$ , log t-  
14 test, number of transcripts  $> 20,000$ . Data were based on samples from two independent  
15 preparations with 3-6 mice in each, plus two technical replicates. (E) Dynamic changes in the  
16 poly(A) length of *Spata6* transcripts during spermiogenesis. The x-axis stands for the male  
17 germ cell types, and the y-axis represents the average poly(A) length. CPM is indicated by  
18 lines with blue gradients. *Spata6* mRNA levels increase from pachytene spermatocytes to  
19 round spermatids and then peak in elongating spermatids while the poly(A) tails are  
20 lengthening during the same period.

21

22

23

24

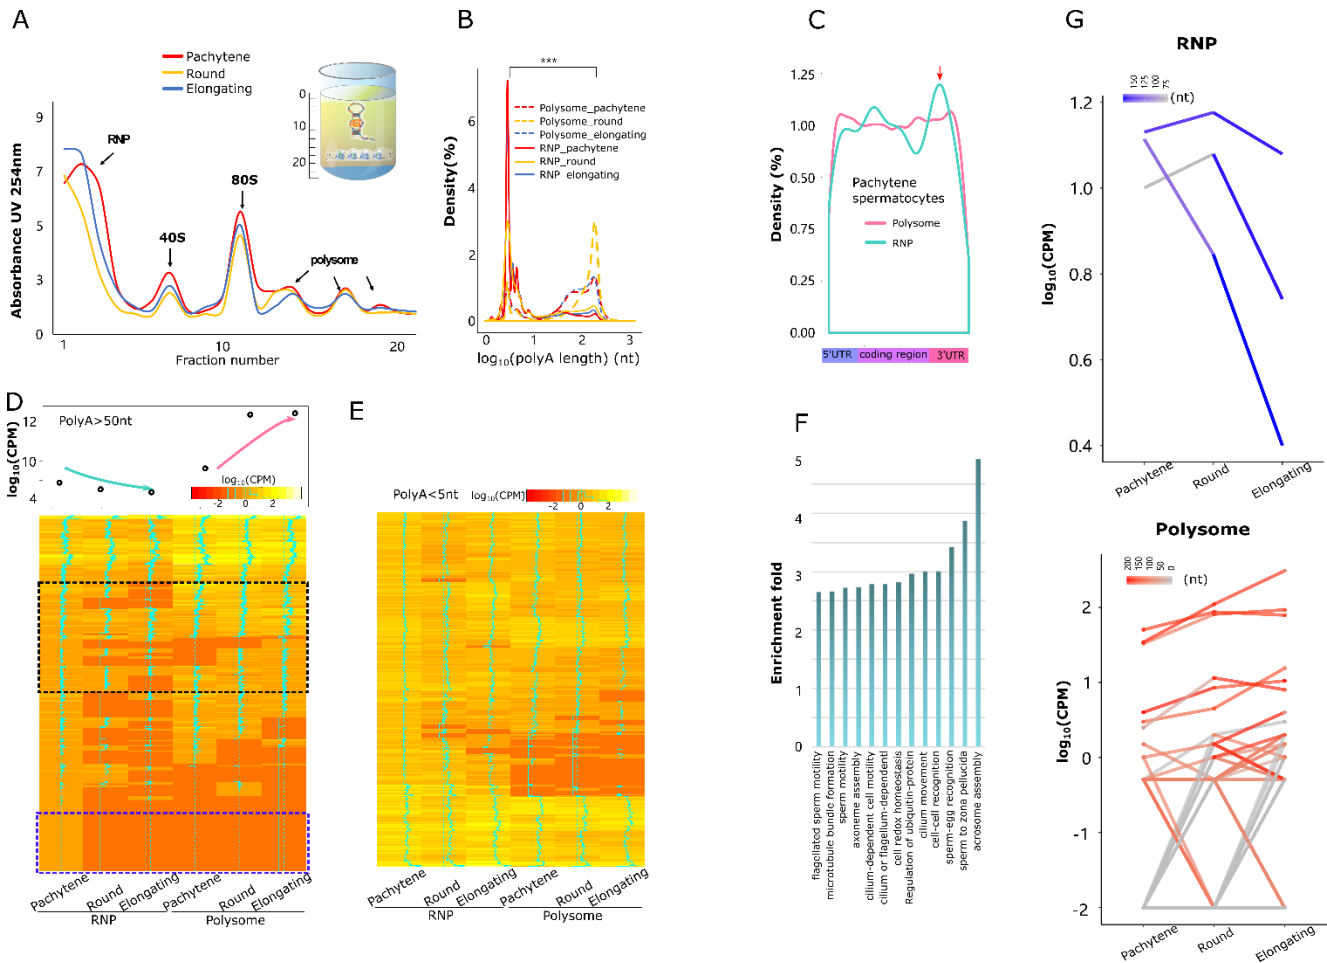

1

2 **Figure 2. Poly(A) length distribution in the RNP granules and polysome fractions. (A)**

3 The sucrose gradient centrifugation separates the RNP granules and polysome fractions from

4 purified pachytene spermatocytes, round and elongating spermatids. The diagram shows the

5 RNA abundance (y-axis) in RNP, mono- and polysome fractions (x-axis). (B) Density plots

6 showing poly(A) length distribution in the RNP granules and polysomes in pachytene

7 spermatocytes, round and elongating spermatids. The RNAs with shorter poly(A) tails are

8 enriched in the RNP granules with an average poly(A) length of 5 nt, whereas those with longer

9 poly(A) tails are enriched in the polysome fractions with an average length of 200 nt. \*\*\*: p <

10 0.01, log t-test, number of transcript > 10,000. Data were based on samples from two

11 independent preparations with 3-6 mice in each, plus two technical replicates. (C) Density

12 plots showing distributions of the bioinformatically predicted miRNA targeting sites in

1 transcripts enriched in RNP granules and polysome fractions in pachytene spermatocytes. The  
2 y-axis represents the density of the targeting sites, while the x-axis shows the full-length  
3 mRNAs. The RNP-enriched miRNAs preferentially target the 3'UTRs of mRNAs. (D) Heatmap  
4 showing that levels of mRNAs with the newly added longer poly(A) tails (>50bp) gradually  
5 decrease in RNP granules and increase in the corresponding polysome fractions in the three  
6 spermatogenic cell types. The top panel shows the average expression levels of these mRNAs  
7 in each fraction. (E) Heatmap showing that the levels of mRNAs with shorter poly(A) tails (<5nt)  
8 do not significantly change in RNP fractions. (F) GO term enrichment analyses of the mRNAs  
9 with longer poly(A) tails (>50nt) in the RNP granules of three male germ cell types. (G)  
10 Changes in expression levels of 25 *Spata6* isoforms in the RNP granules and polysomes. The  
11 x-axis indicates the three spermiogenic cell types, and the y-axis shows the levels/CPM of  
12 various isoforms. The specific color scheme corresponds to various poly(A) lengths. Levels of  
13 *Spata6* isoforms decrease with the increasing poly(A) length in RNP granules (darker blue  
14 indicates longer poly(A). In contrast, levels of *Spata6* isoforms increase with poly(A)  
15 lengthening (darker red indicates longer poly(A) in polysomes. Data were based on samples  
16 from two independent preparations with 3-6 mice in each, plus two technical replicates.

17

18

19

20

21

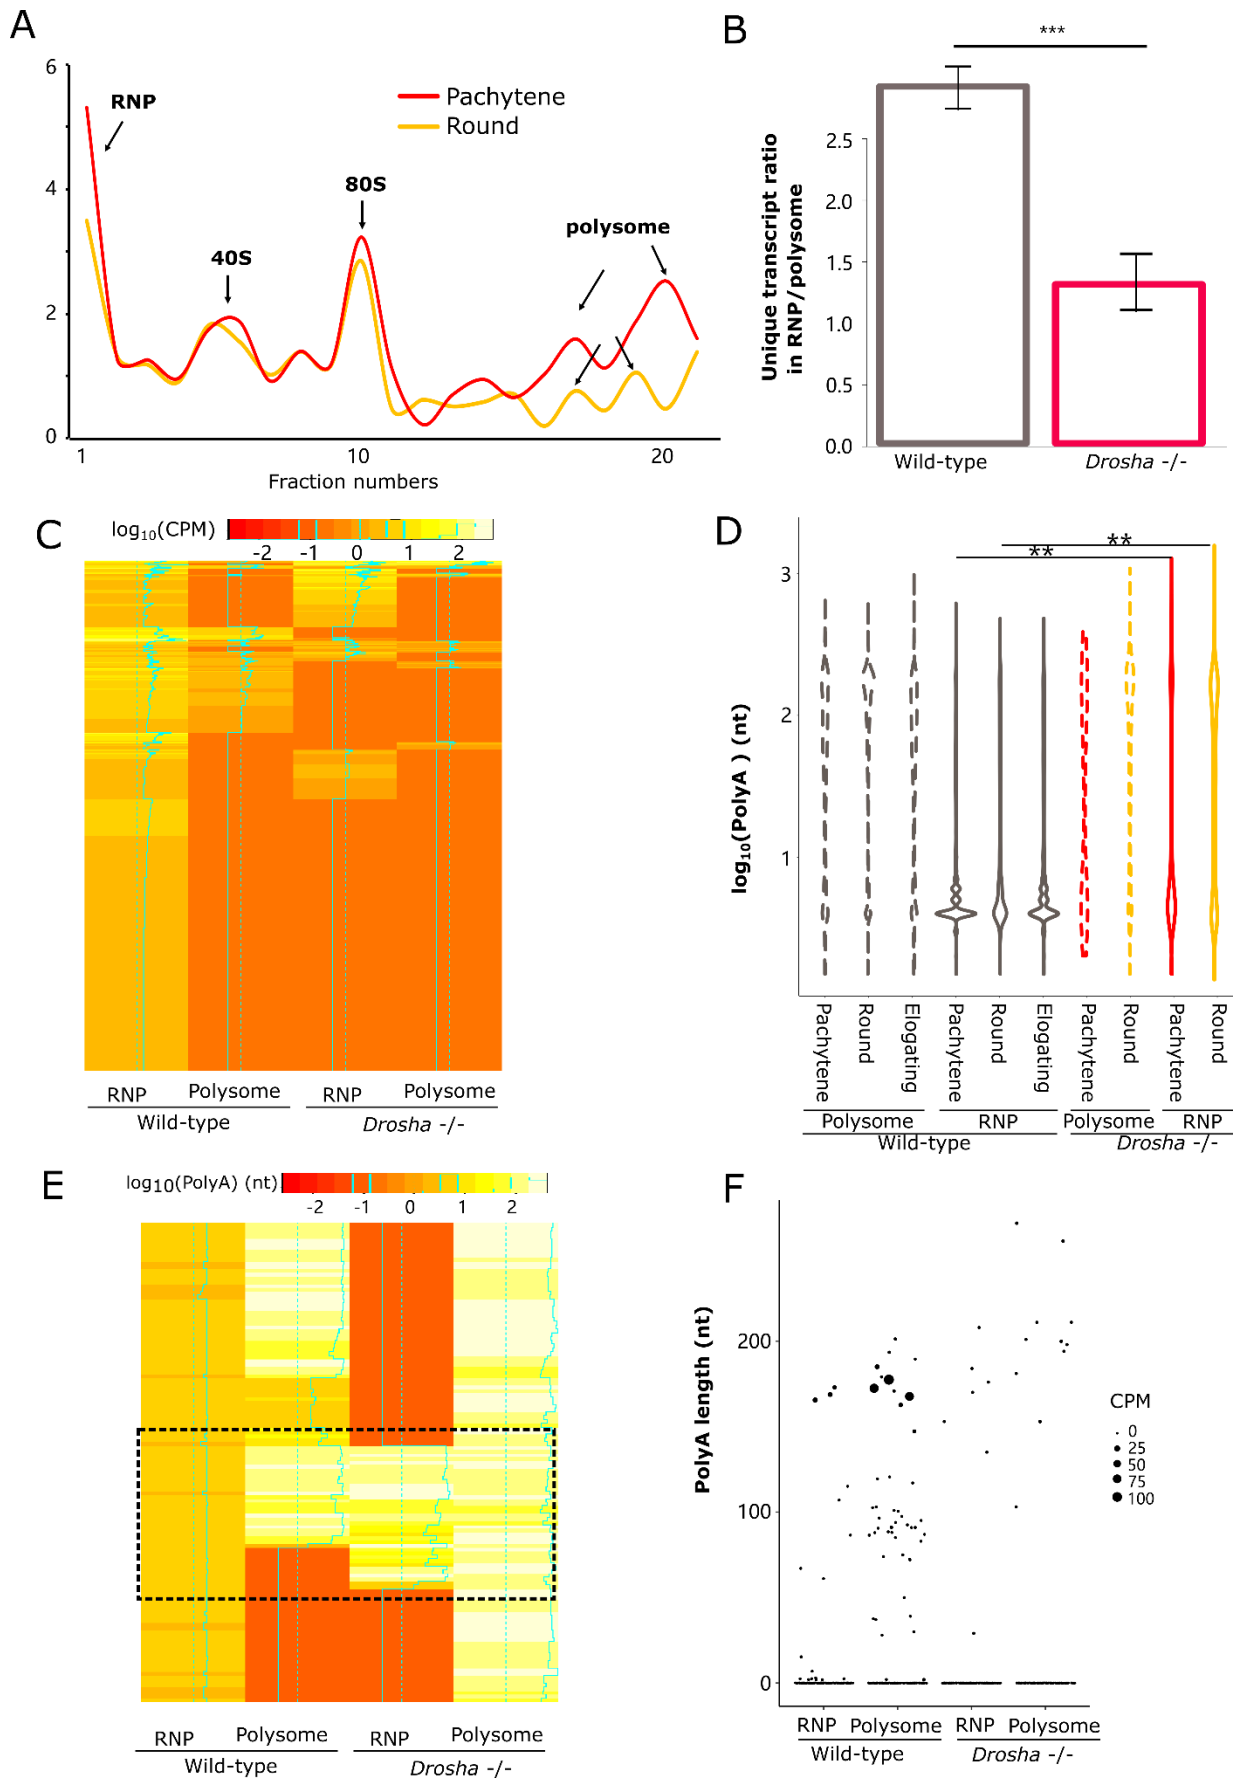

1 **Figure 3. Effects of miRNA deficiency on the poly(A) length distribution in the RNP**  
2 **granules and polysome fractions.** (A) Distribution of RNA contents in the RNP and polysome  
3 fractions in purified *Droscha*-null pachytene spermatocytes and round spermatids. (B) Bar  
4 graphs showing the ratio of RNP-enriched vs. polysomes-enriched transcripts in wild-type and  
5 *Droscha*-null pachytene spermatocytes and round spermatids. \*\*\*:  $p < 0.01$ , Wilcoxon rank test.  
6 Wild-type samples were from two independent preparations with 3-6 mice in each, plus two  
7 technical replicates. *Droscha* KO samples were from single preparation with 6-10 KO testes  
8 plus two technical replicates. (C) Heatmap showing the expression level of wild-type RNPs  
9 enriched transcripts among fractions. RNP enriched transcripts in wild type round spermatids  
10 are generally down-regulated in both RNP and polysome fractions in *Droscha*-null round  
11 spermatids. (D) Violin plots showing the poly(A) length distribution in the RNP and polysome  
12 fractions of wild-type and *Droscha*-null spermatogenic cells. \*\*:  $p < 0.05$ , Student t-test, number  
13 of transcripts  $> 10,000$ . Wild-type samples were from two independent preparations with 3-6  
14 mice in each, plus two technical replicates. *Droscha* KO samples were from single preparation  
15 with 6-10 KO testes plus two technical replicates. (E) Heatmap showing poly(A) length of  
16 transcripts enriched in RNP in wild-type round spermatids are largely absent in the RNPs of  
17 *Droscha*-null round spermatids, and these appear to be stuck in the polysome fractions with  
18 elongated long poly(A) tails. Partial transcripts also could bind to RNPs with long poly(A) tails  
19 (Black square). (F) Dot plot showing the distribution of the abundance of *Spata6* isoforms with  
20 different poly(A) length in both RNP and polysome fractions of wild type and *Droscha*-null round  
21 spermatids. Wild-type samples were from two independent preparations with 3-6 mice in each,  
22 plus two technical replicates. *Droscha* KO samples were from single preparation with 6-10 KO  
23 testes plus two technical replicates.

A

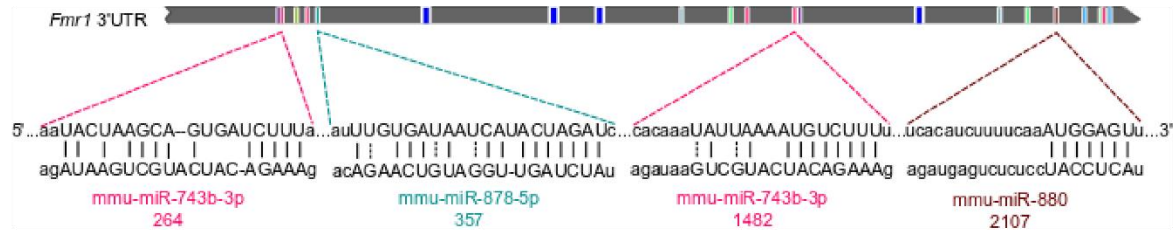

B

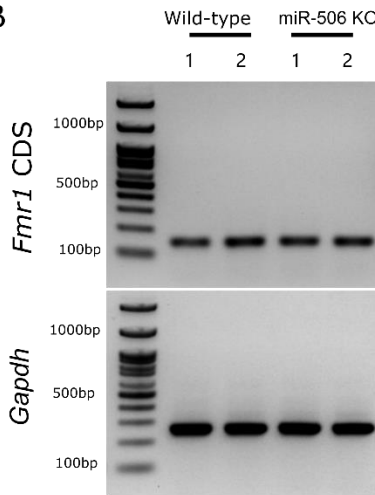

D

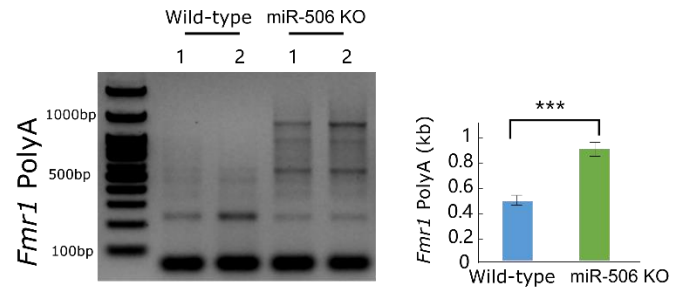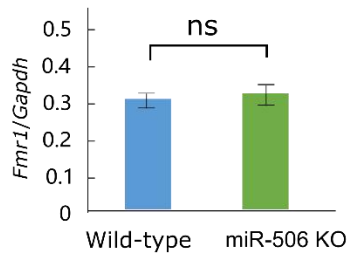

E

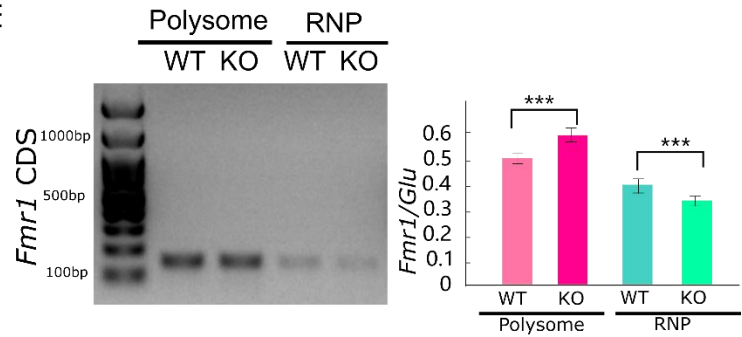

C

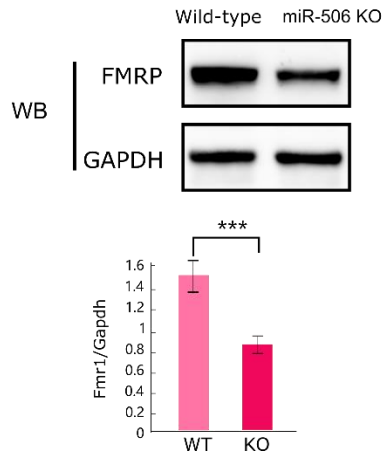

F

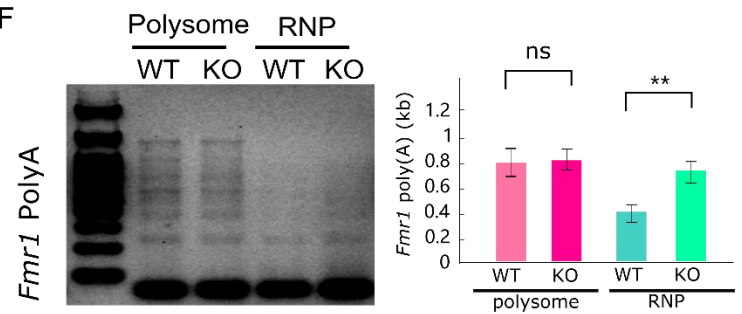

1

1

2 **Figure 4. *miR-506* family miRNAs regulate the poly(A) length of their target gene *Fmr1***  
3 **in the testis.** (A) Schematic illustration showing the targeting sites in *Fmr1* 3' UTR by 4 of the  
4 *miR-506* family, as previously reported [49]. (B) Semi-quantitative RT-PCR analyses on levels  
5 of *Fmr1* mRNA (CDS for coding sequences) in total testes of the *miR-506* family KO and wild-  
6 type male mice. *Gaphd* was used as the loading control. Histograms display quantitative  
7 analyses of the data (mean  $\pm$  SEM) from biological triplicates (n=3). (C) Western blot analyses  
8 of *Fmr1* protein (FMRP) levels in the *miR-506* family KO and wild-type testes. Data are  
9 presented as mean  $\pm$  SEM, using biological triplicates (n=3). (D) Distribution of the poly(A)  
10 length of *Fmr1* mRNAs in total testes of the *miR-506* family KO and wild-type control male  
11 mice. Left panels show representative gel images, whereas right panels display quantitative  
12 analyses of the data (mean  $\pm$  SEM) from biological triplicates (n=3). (E) Semi-quantitative RT-  
13 PCR analyses on levels of *Fmr1* mRNA (CDS for coding sequences) in RNP and polysome  
14 fractions in the *miR-506* family KO and wild-type testes. *Clu*, known not to display delayed  
15 translation was used as the loading control. The left panels show representative gel images.  
16 Histograms (right panels) display quantitative analyses of the data (mean  $\pm$  SEM) from  
17 biological triplicates (n=3). (F) Distribution of the poly(A) length of *Fmr1* mRNAs in testicular  
18 RNP and polysome fractions of the *miR-506* family KO and wild-type control male mice. Left  
19 panels show representative gel images, whereas right panels display quantitative analyses of  
20 the data (mean  $\pm$  SEM) from biological triplicates (n=3).

21
